# Supplementary material
Source: ML conference proceedings conference paper supplement (https://proceedings.neurips.cc/paper_files/paper/2018/hash/7fb8ceb3bd59c7956b1df66729296a4c-Abstract.html)
Supplement: Supplementary file [file 7fb8ceb3bd59c7956b1df66729296a4c-Supplemental.zip]

---

# Supplementary Material: Gradient Descent Meets Shift-and-Invert Preconditioning for Eigenvector Computation

---

**Zhiqiang Xu**

Cognitive Computing Lab (CCL), Baidu Research  
National Engineering Laboratory of Deep Learning Technology and Application, China  
xuzhiqiang04@baidu.com

**Shift Parameter** Garber and Hazan [2015] and Wang et al. [2017]’s procedure to locate a shift parameter  $\sigma$  is described in Algorithm 1.

**Lemma 1**  $\tau_p \sin^2 \theta(\mathbf{x}, \mathbf{V}_p) \leq \mu_1 - \mathbf{x}^\top \mathbf{B} \mathbf{x} \leq (\mu_1 - \mu_n) \sin^2 \theta(\mathbf{x}, \mathbf{V}_p)$  and  $\|\tilde{\nabla} h(\mathbf{x})\|_2 \leq 2\mu_1 \sin \theta(\mathbf{x}, \mathbf{V}_p)$ .

**Proof** I) Write the full eigenvalue decomposition of  $\mathbf{B}$  as

$$\mathbf{B} = \mu_1 \mathbf{V}_p \mathbf{V}_p^\top + \mathbf{V}_p^\perp \text{diag}(\mu_{p+1}, \dots, \mu_n) (\mathbf{V}_p^\perp)^\top, \quad (1)$$

where  $\mathbf{V}_p^\perp$  represents the orthogonal complement of  $\mathbf{V}_p$ . One then has

$$\begin{aligned} \mu_1 - \mathbf{x}^\top \mathbf{B} \mathbf{x} &= \mu_1 - \mu_1 \mathbf{x}^\top \mathbf{V}_p \mathbf{V}_p^\top \mathbf{x} - \mathbf{x}^\top \mathbf{V}_p^\perp \text{diag}(\mu_{p+1}, \dots, \mu_n) (\mathbf{V}_p^\perp)^\top \mathbf{x} \\ &\geq \mu_1 \sin^2 \theta(\mathbf{x}, \mathbf{V}_p) - \mu_{p+1} \mathbf{x}^\top \mathbf{V}_p^\perp (\mathbf{V}_p^\perp)^\top \mathbf{x} \\ &= \mu_1 \sin^2 \theta(\mathbf{x}, \mathbf{V}_p) - \mu_{p+1} \mathbf{x}^\top (\mathbf{I} - \mathbf{V}_p \mathbf{V}_p^\top) \mathbf{x} \\ &= \tau_p \sin^2 \theta(\mathbf{x}, \mathbf{V}_p). \end{aligned}$$

On the other hand,

$$\begin{aligned} \mu_1 - \mathbf{x}^\top \mathbf{B} \mathbf{x} &= \mu_1 - \mu_1 \mathbf{x}^\top \mathbf{V}_p \mathbf{V}_p^\top \mathbf{x} - \mathbf{x}^\top \mathbf{V}_p^\perp \text{diag}(\mu_{p+1}, \dots, \mu_n) (\mathbf{V}_p^\perp)^\top \mathbf{x} \\ &\leq \mu_1 \sin^2 \theta(\mathbf{x}, \mathbf{V}_p) - \mu_n \mathbf{x}^\top \mathbf{V}_p^\perp (\mathbf{V}_p^\perp)^\top \mathbf{x} \\ &= \mu_1 \sin^2 \theta(\mathbf{x}, \mathbf{V}_p) - \mu_n \mathbf{x}^\top (\mathbf{I} - \mathbf{V}_p \mathbf{V}_p^\top) \mathbf{x} \\ &= (\mu_1 - \mu_n) \sin^2 \theta(\mathbf{x}, \mathbf{V}_p). \end{aligned}$$

II) For any  $\mathbf{v} \in \mathcal{V}_{p,1}$ , we can write  $\mathbf{B} = \mu_1 \mathbf{v} \mathbf{v}^\top + \mathbf{v}_\perp \text{diag}(\mu_2, \dots, \mu_n) \mathbf{v}_\perp^\top$ . Plugging in the above equation to the gradient, one gets

$$\begin{aligned} \|\tilde{\nabla} h(\mathbf{x})\|_2^2 &= \|(\mathbf{I} - \mathbf{x} \mathbf{x}^\top) \mathbf{B} \mathbf{x}\|_2^2 = \|\mathbf{x}_\perp^\top (\mu_1 \mathbf{v} \mathbf{v}^\top + \mathbf{v}_\perp \text{diag}(\mu_2, \dots, \mu_n) \mathbf{v}_\perp^\top) \mathbf{x}\|_2^2 \\ &\leq 2\mu_1^2 \|\mathbf{x}_\perp^\top \mathbf{v}\|^2 + 2\mu_2^2 \|\mathbf{v}_\perp^\top \mathbf{x}\|^2 = 2\mu_1^2 (1 - (\mathbf{x}^\top \mathbf{v})^2) + 2\mu_2^2 (1 - (\mathbf{v}^\top \mathbf{x})^2) \\ &\leq 4\mu_1^2 (1 - (\mathbf{x}^\top \mathbf{v})^2). \end{aligned}$$

Since the above inequality holds for any  $\mathbf{v} \in \mathcal{V}_{p,1}$ , we get

$$\|\tilde{\nabla} h(\mathbf{x})\|_2^2 \leq 4\mu_1^2 \min_{\mathbf{v} \in \mathcal{V}_{p,1}} (1 - (\mathbf{x}^\top \mathbf{v})^2) = 4\mu_1^2 \sin^2 \theta(\mathbf{x}, \mathbf{V}_p).$$

□

**Lemma 2**  $\frac{x}{1+x} \leq \log(1+x) \leq x$  for any  $x > -1$ , while for any  $x \in (0, 1)$  it holds that  $\frac{x}{-\log(1-x)} \geq \frac{1}{1-\log(1-x)}$ .

---

**Algorithm 1** [Garber and Hazan, 2015, Wang et al., 2017] locate  $\sigma = \lambda_1 + c\Delta_p$

---

```

1: Input: matrix  $\mathbf{A}$  and lower estimate  $\eta$  satisfying  $c_1\Delta_p \leq \eta \leq c_2\Delta_p$  where  $0 < c_1 < c_2 \leq 1$ .
2:  $\tilde{\mathbf{y}}_0 = \mathbf{u}/\|\mathbf{u}\|_2$  where  $\mathbf{u} \in \mathbb{R}^{n \times 1}$  and  $\mathbf{u}_i \sim \mathcal{N}(0, 1)$ 
3:  $s = 0$  and  $\sigma_s = 1 + \eta$ 
4: repeat
5:    $\mathbf{y}_0 = \tilde{\mathbf{y}}_s$ 
6:   for  $t = 1, 2, \dots, m$  do
7:      $\mathbf{z}^* \approx \arg \min_{\mathbf{z}} \frac{1}{2} \mathbf{z}^\top (\sigma_s \mathbf{I} - \mathbf{A}) \mathbf{z} - \mathbf{y}_{t-1}^\top \mathbf{z}$  starting from  $\mathbf{z}_0 = \frac{\mathbf{y}_{t-1}}{\mathbf{y}_{t-1}^\top (\sigma_s \mathbf{I} - \mathbf{A}) \mathbf{y}_{t-1}}$ 
8:      $\mathbf{y}_t = \mathbf{z}^* / \|\mathbf{z}^*\|_2$ 
9:   end for
10:   $\tilde{\mathbf{y}}_{s+1} = \mathbf{y}_m$ 
11:   $\mathbf{w}^* \approx \arg \min_{\mathbf{w}} \frac{1}{2} \mathbf{w}^\top (\sigma_s \mathbf{I} - \mathbf{A}) \mathbf{w} - \tilde{\mathbf{y}}_{s+1}^\top \mathbf{w}$  starting from  $\mathbf{w}_0 = \frac{\tilde{\mathbf{y}}_{s+1}}{\tilde{\mathbf{y}}_{s+1}^\top (\sigma_s \mathbf{I} - \mathbf{A}) \tilde{\mathbf{y}}_{s+1}}$ 
12:   $\eta_{s+1} = \frac{1}{2} \frac{1}{\tilde{\mathbf{y}}_{s+1}^\top \mathbf{w}^* - \frac{1}{8} (1 + \frac{1-c_2}{c_2} \eta)}$  and  $\sigma_{s+1} = \sigma_s - \frac{1}{2} \eta_{s+1}$ 
13:   $s \leftarrow s + 1$ 
14: until  $\eta_s \leq \eta$ 
15: Output:  $\sigma = \sigma_s$  and  $\mathbf{x}_0 = \tilde{\mathbf{y}}_s$ 

```

---

**Proof** 1) For any  $x$ , it holds that  $1 + x \leq e^x$ . Then for any  $x > -1$ ,

$$\log(1 + x) \leq x.$$

If one lets  $y = 1 + x$  in the above inequality, then  $\log y \leq y - 1$ . Further letting  $y = \frac{1}{z}$  yields  $\log z \geq -\frac{1}{z} + 1 = \frac{z-1}{z}$ . Last, setting  $z = 1 + x$  gives us

$$\log(1 + x) \geq \frac{x}{1 + x}.$$

2) Note that  $\log(1 + x) = \sum_{i=0}^{\infty} (-1)^i \frac{x^{i+1}}{i+1}$  for  $|x| < 1$ . One then can write for  $x \in (0, 1)$  that

$$\begin{aligned} \frac{x}{-\log(1-x)} &= \frac{x}{-\sum_{i=0}^{\infty} (-1)^i \frac{(-x)^{i+1}}{i+1}} = \frac{1}{\sum_{i=0}^{\infty} \frac{x^i}{i+1}} = \frac{1}{1 + \sum_{i=1}^{\infty} \frac{x^i}{i+1}} \\ &\geq \frac{1}{1 + \sum_{i=1}^{\infty} \frac{x^i}{i}} = \frac{1}{1 - \sum_{i=1}^{\infty} (-1)^{i-1} \frac{(-x)^i}{i}} = \frac{1}{1 - \log(1-x)}. \end{aligned}$$

□

**Lemma 3** [Wang et al., 2017] Let  $\mathbf{z}^* = \arg \min l_t(\mathbf{z}) = \mathbf{B}\mathbf{x}_{t-1}$ ,  $\xi_t = \mathbf{y}_t - \mathbf{z}^*$ , and  $\epsilon_t = l_t(\mathbf{y}_t) - l_t(\mathbf{z}^*)$ . Then  $\|\xi_t\|_2 \leq \sqrt{2\mu_1\epsilon_t}$  and  $l_t(\mathbf{z}_0) - l_t(\mathbf{z}^*) \leq \frac{\mu_1^2}{2\mu_n} \sin^2 \theta(\mathbf{x}_{t-1}, \mathbf{V}_p)$ . Moreover, Nesterov's accelerated gradient descent takes  $O(\sqrt{\frac{\lambda_1}{\Delta_p}} \log \frac{l_t(\mathbf{z}_0) - l_t(\mathbf{z}^*)}{\epsilon_t})$  complexity for solving Problem (4) (in the main text) to sub-optimality  $\epsilon_t$ .

**Proof** I) The proof can be found in [Wang et al., 2017] and is included here with slight modification. For the quadratic function  $l_t(\mathbf{z})$ , we can write

$$\epsilon(\mathbf{z}) = l_t(\mathbf{z}) - l_t(\mathbf{z}^*) = \frac{1}{2} (\mathbf{z} - \mathbf{z}^*)^\top \mathbf{B}^{-1} (\mathbf{z} - \mathbf{z}^*) = \frac{1}{2} \|\mathbf{z} - \mathbf{z}^*\|_{\mathbf{B}^{-1}}^2.$$

Thus,

$$\begin{aligned} \|\xi_t\|_2 &= \|\mathbf{y}_t - \mathbf{z}^*\|_2 = \|\mathbf{B}^{\frac{1}{2}} \mathbf{B}^{-\frac{1}{2}} (\mathbf{y}_t - \mathbf{z}^*)\|_2 \\ &\leq \|\mathbf{B}^{\frac{1}{2}}\|_2 \|\mathbf{B}^{-\frac{1}{2}} (\mathbf{y}_t - \mathbf{z}^*)\|_2 = \sqrt{\mu_1} \|\mathbf{y}_t - \mathbf{z}^*\|_{\mathbf{B}^{-1}} \\ &= \sqrt{2\mu_1\epsilon_t}. \end{aligned}$$

Note that

$$s(\gamma) = \epsilon(\gamma \mathbf{x}_{t-1}) = l_t(\gamma \mathbf{x}_{t-1}) - l_t(\mathbf{z}^*) = \frac{\gamma^2}{2} \mathbf{x}_{t-1}^\top \mathbf{B}^{-1} \mathbf{x}_{t-1} - \gamma - l_t(\mathbf{z}^*),$$

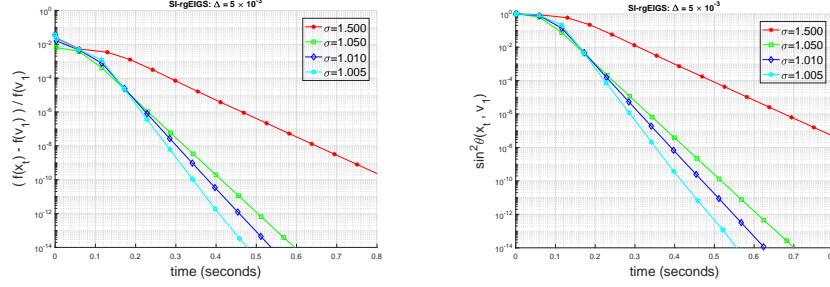

Figure 1: Synthetic data.

Table 1: Statistics of the data.

| Matrix      | n     | # nonzero entries |
|-------------|-------|-------------------|
| hangGlider5 | 16011 | 155246            |
| Boeing35    | 30237 | 1450163           |
| indef_d     | 60000 | 299998            |
| indef_a     | 60008 | 255004            |
| dimacs10_ct | 67578 | 336352            |
| dimacs10_nv | 84538 | 416998            |

which is minimized at  $\gamma = \frac{1}{\mathbf{x}_{t-1}^\top \mathbf{B}^{-1} \mathbf{x}_{t-1}}$ . Thus, we have

$$\begin{aligned}
l_t(\mathbf{z}_0) - l_t(\mathbf{z}^*) &\leq l_t(\mu_1 \mathbf{x}_{t-1}) - l_t(\mathbf{z}^*) = \frac{\mu_1^2}{2} \mathbf{x}_{t-1}^\top \mathbf{B}^{-1} \mathbf{x}_{t-1} - \mu_1 - l_t(\mathbf{z}^*) \\
&= \frac{\mu_1^2}{2} \sum_{i=1}^n \frac{(\mathbf{v}_i^\top \mathbf{x}_{t-1})^2}{\mu_i} - \mu_1 \sum_{i=1}^n (\mathbf{v}_i^\top \mathbf{x}_{t-1})^2 + \frac{1}{2} \sum_{i=1}^n \mu_i (\mathbf{v}_i^\top \mathbf{x}_{t-1})^2 \\
&\leq \frac{1}{2} \sum_{i=1}^n \frac{(\mu_1 - \mu_i)^2}{\mu_i} (\mathbf{v}_i^\top \mathbf{x}_{t-1})^2 \leq \frac{\mu_1^2}{2\mu_n} \sum_{i=p+1}^n (\mathbf{v}_i^\top \mathbf{x}_{t-1})^2 \\
&= \frac{\mu_1^2}{2\mu_n} (1 - \sum_{i=1}^p (\mathbf{v}_i^\top \mathbf{x}_{t-1})^2) = \frac{\mu_1^2}{2\mu_n} (1 - \|\mathbf{V}_p^\top \mathbf{x}_{t-1}\|^2) \\
&= \frac{\mu_1^2}{2\mu_n} \sin^2 \theta(\mathbf{x}_{t-1}, \mathbf{V}_p).
\end{aligned}$$

II) The complexity can be obtained by noting that the Hessian of  $l_t(\mathbf{z})$  satisfies

$$\frac{1}{\mu_1} \mathbf{I} \preccurlyeq \text{Hessian}(l_t(\mathbf{z})) = \mathbf{B}^{-1} \preccurlyeq \frac{1}{\mu_n} \mathbf{I}.$$

That is,  $l_t(\mathbf{z})$  is  $\frac{1}{\mu_1}$ -strongly convex and  $\frac{1}{\mu_n}$ -smooth. Thus, Nesterov's accelerated gradient descent takes

$$O\left(\sqrt{\frac{\frac{1}{\mu_n}}{\frac{1}{\mu_1}}} \log \frac{l_t(\mathbf{z}_0) - l_t(\mathbf{z}^*)}{\epsilon_t}\right) = O\left(\sqrt{\frac{\lambda_1}{\Delta_p}} \log \frac{l_t(\mathbf{z}_0) - l_t(\mathbf{z}^*)}{\epsilon_t}\right)$$

complexity to reach suboptimality  $\epsilon_t$ . □

**Robustness of  $\sigma$**  We test the robustness of  $\sigma$  on the synthetic data with  $\Delta = 5 \times 10^{-3}$ . Performance of the algorithm with varying  $\sigma$  and best-tuned constant step-size is shown in Figure 1. We see that smaller  $\sigma$  yields faster convergence.

**Real Data** It can be found at [www.cise.ufl.edu/research/sparse/matrices/](http://www.cise.ufl.edu/research/sparse/matrices/). See Table 1 for the statistics of the data.

## References

- Dan Garber and Elad Hazan. Fast and simple pca via convex optimization. *arXiv preprint arXiv:1509.05647*, 2015.
- Jialei Wang, Weiran Wang, Dan Garber, and Nathan Srebro. Efficient coordinate-wise leading eigenvector computation. *CoRR*, abs/1702.07834, 2017. URL <http://arxiv.org/abs/1702.07834>.
